# Modeling the Epidemic Dynamics and Control of COVID-19 Outbreak in China

Shilei Zhao<sup>a,b,c</sup>, Hua Chen<sup>a,b,c,d,\*</sup>

<sup>a</sup>*CAS Key Laboratory of Genomic and Precision Medicine, Beijing Institute of Genomics, Chinese Academy of Sciences, Beijing 100101, China*

<sup>b</sup>*China National Center for Bioinformation, Beijing 100101, China*

<sup>c</sup>*School of Future Technology, University of Chinese Academy of Sciences, Beijing 100049, China*

<sup>d</sup>*CAS Center for Excellence in Animal Evolution and Genetics, Chinese Academy of Sciences, Kunming 650223, China*

## Abstract

The coronavirus disease 2019 (COVID-19) is rapidly spreading over China and more than 30 countries in last two months. COVID-19 has multiple characteristics distinct from other infectious diseases, including a high infectivity during incubation, time delay between real dynamics and daily observed case numbers, and the effects from multiple quarantine and control measures. We develop a model SUQC to adequately characterizes the dynamics of COVID-19 and explicitly model the control by artificial measures, which is more suitable for analysis than other existing epidemic models.

The SUQC model is applied to the daily released data of the confirmed infected to analyze the outbreak of COVID-19 in Wuhan, Hubei (excluding Wuhan), China (excluding Hubei) and four first-tier cities of China. We find that, before January 30, 2020, all these regions except Beijing have a reproductive number  $R > 1$ , and after January 30, all regions have a reproductive number  $R < 1$ , indicating the effectiveness of the quarantine and control measures in inhibiting COVID-19. The confirmation rate of Wuhan is 0.0643, significantly lower than 0.1914 of Hubei (excluding Wuhan) and 0.2189 of China (excluding Hubei), but increases to 0.3229 after Feb 12th when clinical diagnosis was adopted. The un-quarantined infected individuals in Wuhan on February 12, 2020 is as high as 3,509 and decreases to 334 on February 21th, 2020.

After fitting the model with recent data, we predict that the end times of COVID-19 of Wuhan and Hubei are around late-March, of China (excluding Hubei) around mid-March, and of the four tier-one cities before March 2020. A total of 80,511 individuals of the whole country are infected, among which 49,510 are from Wuhan, 17,679 from Hubei(excluding Wuhan), and the rest 13,322 from other regions of China (excluding Hubei). We suggest the rigorous quarantine and control

---

\*Corresponding author: [chenh@big.ac.cn](mailto:chenh@big.ac.cn)

measures should be kept before March in Beijing, Shanghai, Guangzhou and Shenzhen, and before late-March in Hubei. The model can also be useful to predict the trend of epidemic and provide quantitative guide for other counties in a high risk of outbreak, such as South Korea, Japan and Iran.

*Keywords:* Coronavirus disease 2019, SARS-CoV-2, epidemic model

## 1 Introduction

2 The outbreak of coronavirus disease 2019 (COVID-19) was initially identified in mid-December  
3 2019 in Wuhan, China (1; 2). The earliest patients in Wuhan are related to exposure from a seafood  
4 market. Later, the number of patients grows drastically due to human-to-human transmission (3).  
5 The incubation period of COVID-19 is reported to be 3-7 days, at most 14 days, which varies  
6 greatly among patients (4). The novel coronavirus is believed to be infectious during incubation  
7 period when no symptoms are shown on the patients (5), an important characteristics differentiating  
8 COVID-19 from its close relative SARS. Considerable measures have been implemented to control  
9 the outbreak in Wuhan and China, mainly by quarantine to reduce transmission. On Jan 23rd,  
10 2020, Wuhan restricted travel outside the city. Any person exposed to COVID-19 is required to  
11 perform a self-isolation for 14 days. Around Jan 25rd, 2020, nucleic acid kit was developed to  
12 diagnose the patients. On Feb 12th, 2020, clinical diagnosis was used to assist the confirmation of  
13 infection in Hubei province. Nonetheless, COVID-19 has spread to all provinces of China and more  
14 than 30 other countries in the last two months(6; 7).

15 COVID-19 has three features that make it hard to describe with the existing epidemic models  
16 including SIR, SEIR etc (8; 9). Firstly, COVID-19 has a relatively long incubation period which  
17 causes a time delay between real dynamic and the daily observed case numbers. Secondly, the  
18 epidemic trend heavily depends on multiple artificial factors, including local medical resources,  
19 quarantine measures, and the efficiency of conformation approaches, which should be explicitly  
20 modeled. For example, the outbreak is more severe in Wuhan compared to other cities in China  
21 which constrains the medical resources, therefore the infected need a longer time to be confirmed  
22 and reported in the official released numbers. This potentially leads to a larger difference between  
23 real and reported infected cases in Wuhan than in other places. This could also explain why  
24 a sudden increase of confirmed infected cases was observed when clinical diagnosis was adopted  
25 in confirmation in Wuhan. Lastly, the quarantine measures are widely implemented, and the  
26 quarantined have a lower chance to infect the susceptible individuals. This is critical for controlling

1 the spread across China.

2 The characteristics of COVID-19 outbreak and control are distinct from existing infectious  
3 diseases, and the existing epidemic models cannot be applied to describe the observed data directly.  
4 We thus propose to use a simple SUQC model (**S**usceptible, **U**n-quarantined infected, **Q**uarantined  
5 infected, **C**onfirmed infected). SUQC distinguishes the infected individuals to be un-quarantined,  
6 quarantined but not confirmed, and confirmed. Among the three types, the confirmed number is  
7 the data we can directly observe from the official released report. Only un-quarantined infected  
8 have ability to infect susceptible individuals and affect the development of the epidemic. In our  
9 proposed model, the quarantine rate parameter is used to quantify the strength of quarantine  
10 policy on the development of epidemics, and the confirmation rate parameter is used to measure  
11 the efficiency of confirmation based on the released data. The two parameters can solve from fitting  
12 the observed confirmed cases over time. Note that the model contains only four variables and three  
13 parameters to model both artificial factors and characteristics of epidemics using the data we can  
14 directly observe. We expect that the simplified model will not over fit the data given the short  
15 time span, but will adequately characterize the essential dynamics.

16 We apply the SUQC model to the daily released numbers of confirmed cases in Wuhan city,  
17 Hubei province (excluding Wuhan), China (excluding Hubei) and four first-tier cities: Beijing,  
18 Shanghai, Guangzhou and Shenzhen. The parameters of the model were inferred, and used to  
19 predict the future trends of epidemics in China.

## 20 **Method**

### 21 **SUQC model**

22 SUQC takes into account the following novel epidemic features of COVID-19: (1) the epidemic  
23 has an infection probability during the incubation (presymptomatic) period; (2) various isolation  
24 measures are used to control the development of the epidemic; (3) the main data source is the daily  
25 confirmed infected number released in the official report, which is affected by the detection method  
26 and has a delay between the real infected and confirmed infected number. Four variables related  
27 to the features are used to model the the flows of people between four possible states:

28  $S = S(t)$ , the number of susceptible individuals with no resistance to disease in the population.

29  $S$  is the same as that in existing infectious disease models, e.g. SIR and SEIR.

30  $U = U(t)$ , the number of infected and un-quarantined individuals that can be either presymp-  
31 tomatic or symptomatic. Different from  $E$  in the SEIR model,  $U$  are infectious, and can render a

1 susceptible to be un-quarantined infected.

2  $Q = Q(t)$ , the number of quarantined infected individuals. The un-quarantined infected become  
3 Quarantined infected by isolation or hospitalization, and lose the ability of infecting the susceptible.

4  $C = C(t)$ , the number of confirmed infected cases. The number of confirmed infected is released  
5 by the official agency or media, which may be the only variable with observation that we can  
6 access. Note that  $C$  is usually smaller than the number of real infected individuals, due to the  
7 limited sensitivity of diagnosis methods. The duration of incubation can also cause a time delay of  
8 confirmation. Nevertheless,  $C$  is also the number useful for monitoring and predicting the trend of  
9 epidemic dynamics.

10 Besides the aforementioned variables, we have a composite variable  $I(t) = U(t) + Q(t) + C(t)$ ,  
11 representing the real cumulative number of infected individuals at time  $t$ . The limitation of detec-  
12 tion methods and the medical resources can greatly delay the confirmation process, insomuch the  
13 confirmation proportion  $C/I$  is less than 1 and time-varying.

14  $R$ , the number of removed individuals, is not included in the model as in the SIR/SEIR models.  
15 Once the infected are quarantined, we assume their probability of infecting susceptible individuals  
16 is zero, and thus no matter the infected are recovered or not, they have no affect on the dynamics  
17 of the epidemic system.

18 The model comprises the following independent parameters:

19  $\alpha$  is the infection rate, the mean number of new infected caused by an un-quarantined infected  
20 per day.  $\alpha \in [0, \infty)$ .

21  $\gamma_1$  is the quarantine rate for an un-quarantined infected being quarantined, with the range  
22  $\gamma_1 \in [0, 1]$ . The quarantines can be centralized isolation, self isolation, hospitalization and so on.  
23 It is a parameter representing multi-resource measures to reduce infection caused by  $U$ .

24  $\gamma_2$ , the conformation rate of  $Q$ , is the probability that the quarantined infected are identified  
25 to be confirmatory cases by a conventional method, such as the laboratory diagnosis, with the  
26 range  $\gamma_2 \in [0, 1]$ .  $\gamma_2$  is affected by the incubation period duration, medical conditions, accuracy of  
27 laboratory tests, and other artificial factors such as the time delay between case confirmation and  
28 the official release.  $\gamma_2$  is time-varying since the change of diagnosis criterion and the improvement  
29 of nucleic acid test can accelerate the confirming process.

30  $\sigma$  is the subsequent confirmation rate of those infected that are not confirmed by the conventional  
31 methods, but confirmed with some additional tests. If no other special approaches used,  $\sigma$  is set to  
32 0. Combing two sources of confirmation approaches,  $\beta = \gamma_2 + (1 - \gamma_2)\sigma$  is the total confirmation

1 rate.

2  $\delta$  is the confirmation rate of the un-quarantined infected who can be identified as confirmed  
 3 infected without being quarantined.

4 We thus set up a set of ODE equations to model the dynamics of an infectious disease and  
 5 the control by artificial factors (Eqn. 1). In the model,  $U$  goes directly to  $C$ , or go through  $Q$   
 6 indirectly. Actually, the former can be viewed as a special case of the later with zero delay time  
 7 during  $Q \rightarrow C$ . Thus we delete the direct way and simplified the model as Eqn. 2.

$$\left\{ \begin{array}{l} \frac{dS}{dt} = -\alpha U(t)S(t)/N \\ \frac{dU}{dt} = -\alpha U(t)S(t)/N - \gamma_1 U(t) - (1 - \gamma_1)\delta U(t) \\ \frac{dQ}{dt} = \gamma_1 U(t) - (\gamma_2 + (1 - \gamma_2)\sigma)Q(t) \\ \frac{dC}{dt} = (\gamma_2 + (1 - \gamma_2)\sigma)Q(t) + (1 - \gamma_1)\delta U(t) \end{array} \right. \quad (1)$$

$$\left\{ \begin{array}{l} \frac{dS}{dt} = -\alpha U(t)S(t)/N \\ \frac{dU}{dt} = -\alpha U(t)S(t)/N - \gamma_1 U(t) \\ \frac{dQ}{dt} = \gamma_1 U(t) - (\gamma_2 + (1 - \gamma_2)\sigma)Q(t) \\ \frac{dC}{dt} = (\gamma_2 + (1 - \gamma_2)\sigma)Q(t) \end{array} \right. \quad (2)$$

8 From the above SUQC model, we can further define some biologically meaningful parameters,  
 9 for monitoring and predicting the trend of disease:

10  $T = 1/\gamma_1$  is the mean waiting time from quarantine to confirmation;  $w = 1/(\gamma_2 + (1 - \gamma_2)\sigma)$

1 is the mean time delay from isolation to confirmation; the reproductive number of the infection is  
2  $R = \alpha/\gamma_1$ .

### 3 **Parameter inference**

4 Among the four variables of the model, the number of cumulative confirmed infected,  $C(t)$ , is  
5 usually the only variable with daily observed data to be used for modeling fitting and parameter  
6 inference.

7 The initial value of susceptible individuals  $S(0)$  is approximately equal to the population size.  
8 The initial confirmed infected  $C(0)$  is the number of infected obtained from the official report. Note  
9 that the initial time of the ODE system doesn't have to be at the beginning of the epidemic, and  
10 can start from any time point during the break of COVID-19.

11 Some parameters can be calculated beforehand using the public data directly. We calculate the  
12 infection rate  $\alpha$  using the confirmed infected numbers of Wuhan city during Jan 20th and Jan 27th.  
13 By fitting an exponential curve, we get  $\alpha = 0.2967$ . Confirmed infected numbers during this time  
14 interval may be less bias and represent natural character of COVID-19, while confirmed numbers  
15 are small and fluctuating at early stages before Jan 20th and are affected by strict quarantine  
16 measures in later stages. The parameter  $\alpha$  is hard to estimate accurately. The values estimated by  
17 using different methods or different data sets range from 0.3 to 0.5 (10; 11; 12). Luckily in SUQC  
18 an accurate value of  $\alpha$  is not necessary; the overall infection ability measured by the reproductive  
19 number  $R = \alpha/\gamma_1$  as a compound parameter is sensitive in parameter optimization, and thus the  
20 bias of  $\alpha$  can be balanced by  $\gamma_1$ .

21 Other free parameters and initial values, including  $\gamma_1$ ,  $\beta$ ,  $U(0)$  and  $Q(0)$ , are estimated by  
22 fitting the daily time series of confirmed infected to the model. Denote  $\hat{\mathbf{C}} = f(\gamma_1, \beta, U_0, Q_0)$  as the  
23 expected daily time series of confirmed infected provided by the model (Eqn2), which was solved  
24 by the fourth order Runge-Kutta method with given values of  $\gamma_1$ ,  $\beta$ ,  $U(0)$  and  $Q(0)$ . Define the  
25 loss function,

$$err(\gamma_1, \beta, U_0, Q_0) = \|\mathbf{C} - \hat{\mathbf{C}}\|_2. \quad (3)$$

26 The loss function is then optimized with the interior-point method implemented in the MATLAB  
27 function `fmincon` to infer the parameter values. We try different initial values in parameter op-  
28 timization, and notice that the inferred parameter values are not sensitive to the provided initial  
29 values.

## 1 Results

Table 1: Parameter estimation of epidemic dynamics in Wuhan, Hubei (excludes Wuhan) and China (excluding Hubei). the result list out of brackets are estimated by the stage II data, result in first bracket for stage I data, result in second bracket for stage III data of Wuhan

|                              | Wuhan                         | Hubei (excluding<br>Wuhan) | China (excluding<br>Hubei) |
|------------------------------|-------------------------------|----------------------------|----------------------------|
| Quarantine rate              | 0.3917 (0.0630) (0.6185)      | 0.4880 (0.05)              | 0.5157 (0.1941)            |
| Reproductive number          | 0.7575 (4.7092) (0.4797)      | 0.6079 (5.934)             | 0.5753 (1.5283)            |
| 2 Confirmation rate          | 0.0643 (0.05) (0.3220)        | 0.1914 (0.05)              | 0.2189 (0.05)              |
| End time $U < 1$             | 94 (299) (25)                 | 47 (397)                   | 38 (368)                   |
| End time $C_t - C_{t-1} < 1$ | 136 (328) (31)                | 55 (391)                   | 45 (477)                   |
| Infected number              | 62,557 (8,923, 823) (49, 510) | 17,679 (47,971, 179)       | 13,322 (802,606, 289)      |
| $R^2$                        | 0.9746 (0.8720) (0.9961)      | 0.9863 (0.9390)            | 0.9960 (0.9863)            |

3

Table 2: Parameter inference of the epidemic dynamics in Beijing, Shanghai, Guangzhou and Shenzhen. The results list in brackets are estimated by the stage I data

|                                  | Beijing         | Shanghai         | Guangzhou       | Shenzhen         |
|----------------------------------|-----------------|------------------|-----------------|------------------|
| Quarantine rate                  | 0.5647 (0.3357) | 0.5813 (0.0817)  | 0.5838 (0.2467) | 0.5566 (0.05)    |
| Reproductive number              | 0.5254 (0.8840) | 0.5104 (3.6288)  | 0.5082 (1.2026) | 0.5331 (5.934)   |
| Confirmation rate                | 0.2680 (0.0906) | 0.2846 (0.0881)  | 0.2871 (0.05)   | 0.2599 (0.05)    |
| 4 End time ( $U < 1$ )           | 19 (117)        | 16 (282)         | 19 (481)        | 17 (379)         |
| End time ( $C_t - C_{t-1} < 1$ ) | 23 (103)        | 20 (280)         | 23 (492)        | 21 (372)         |
| Infected number                  | 388 (814)       | 326 (23,524,072) | 345 (4,724,899) | 411 (12,992,106) |
| $R^2$                            | 0.9839 (0.9636) | 0.9864 (0.9760)  | 0.9821 (0.9290) | 0.9845 (0.9617)  |

5 The data of confirmed infected numbers includes 33 consecutive daily records from Jan 20th,  
6 2020 to Feb 21th, 2020 released by the National Health Commission of the People's Republic of  
7 China (see Table S1). We defined time before Jan 30, 2020 as stage I, and after Jan 30th, 2020 as  
8 stage II. To guarantee enough data points within the two stages, the start and end of the stages

1 may vary by one or two days. Wuhan has recently undergone stricter measures of quarantine and  
2 transmission limiting, and clinical diagnosis was adopted after Feb 12th, we thus further did a stage  
3 III analysis of the dynamics in Wuhan using data after Feb 13th.

#### 4 **Remarkable difference among trends inferred from three-stage data**

5 Figure 1 shows the inference and prediction of epidemic dynamics of Wuhan using stage I, II  
6 and III data respectively. The first 15 daily data points (from Jan 28th to Feb 11th) of stage II were  
7 used to fit the model and infer parameters. The following 10 daily data points were used as test data  
8 for evaluating the performance of the model. In Figure 1(B), the blue curve presents the model  
9 fitting result; blue dots present the predicted numbers of the confirmed infected with the fitted  
10 model; and red dots are the observed number of the confirmed. Note that the reported numbers  
11 of confirmed are based on nucleic acid diagnosis before Feb 12th; both results of nucleic acid and  
12 clinical diagnosis are provided from Feb 12th to 14th, and only the total confirmed numbers of  
13 the two diagnoses are provided from Feb 15th to 21th. By comparing with three daily data points  
14 of the nucleic acid diagnosis, we can see the fitted model predicts the trend well. The predicted  
15 numbers of all infected ( $I(t)$ ) are also plotted in Figure 1(B). We can see big gap between the  
16 predicted numbers of total infected and the predicted numbers of confirmed infected in Wuhan.  
17 Clinical diagnosis is adopted by Wuhan local medical agency as an additional diagnosis criterion  
18 after Feb 12th, increasing the confirmation rate and causing a big boost of the number of confirmed  
19 infected. Note that a proportion of the total infected still remains unidentified even with clinical  
20 diagnosis.

21 With the inferred parameters, we further plot the long-term predictions of the numbers of  
22 total infected (I), un-quarantined infected (U), quarantined infected (Q) and cumulative Confirmed  
23 infected (C) in Wuhan (Figure 1(A)). The end time (increment of confirmed infected equals zero)  
24 is predicted to be 136 days from Jan 28th, 2020. The total number of infected individuals is 62,577  
25 (Table 1).

26 We can do a similar analysis using stage I data of Wuhan. The stage I data is informative for  
27 predicting the epidemic trend assuming no rigorous quarantine and control measures. The first 10  
28 daily data points (from Jan 20th) were used to infer the parameters. The rest data points were used  
29 to test the performance of the model (Figure 1(C-D)). As clearly seen in Figure 1(C), the predicted  
30 numbers of  $C(t)$  and  $I(t)$  increase dramatically, which are far beyond the observed numbers after  
31 Jan 21. The number of total infected can be as large as 8,923,823, and the epidemic lasts for a



1 much longer time (299 days, see Table 1). The dramatic difference between predictions from stage  
2 I and stage II data indicates the preventing measures and quarantines, such as travel restrict, are  
3 very efficient in controlling the outburst of the epidemic.

4 Since more strict quarantine and traffic control measures were executed recently to inhibit the  
5 infection of COVID-19 in Wuhan and clinical diagnosis was adopted after Feb 12th, we also analyzed  
6 the stage III data (from Feb 13th). The estimated quarantine rate is 0.6185, much higher than that  
7 of 0.3917 estimated based on stage II data. The total number of infected individuals is estimated  
8 to be 49,510, indicating a further acceleration of the epidemic end (Table 1).

9 Similar analysis was accomplished on stage I and II data of Hubei province (excluding Wuhan),  
10 the whole country (excluding Hubei), and four tier-1 cities in China (Figures 2-3, S1-S4, Tables  
11 1-2). Overall, the model predictions are in high accuracy. We see similar trends in these regions:  
12 the predicted numbers of infected are distinct between results from the two stage data, indicating  
13 the necessity and efficiency of quarantine and control measures. We note that even with stage I  
14 data, Beijing have a reproductive number smaller than 1 (Figure S1, Table 2, 0.8840), indicating  
15 an early-stage prompt and effective response to COVID-19.

16 **Confirmation rate.** From Figures 2-3, S1-S4, we notice that the difference between  $C(t)$   
17 and  $I(t)$  in Wuhan is the biggest. Wuhan has the most infected individuals than any other places  
18 in China (more than 50%), highly beyond the limit of local clinical resources, leading to a long  
19 waiting time for confirmation, and the lowest confirmation rate of 0.0643 in Wuhan, compared with  
20 0.1914 of Hubei (excluding Wuhan), 0.2189 of China (excluding Hubei), 0.2680 of Beijing, 0.2846  
21 of Shanghai, 0.2871 of Guangzhou, and 0.2599 of Shenzhen. As predicted by the model, 26,810  
22 quarantined infected haven't been confirmed in Wuhan by Feb 11th, 2020. The confirmation rate of  
23 Wuhan increases to 0.3229 (Table 1) after Feb 12th when clinical diagnosis was adopted in Wuhan.

24 **Quarantine rate and reproductive number.** At stage II, Wuhan has the smallest quar-  
25 antine rate (0.3917) compared to the other six regions (all close to or larger than 0.5). This leads  
26 to a larger reproductive number ( $R = \alpha/\gamma_1$ ). The reproductive number of Wuhan decreases from  
27 of 0.7575 at stage II to 0.4797 at stage III. Based on reproductive numbers, the epidemic all over  
28 China is apparently under control.

29 **Un-quarantined.** The un-quarantined individuals are the source of new infection. Using stage  
30 II data, the estimated number of  $U(t)$  individuals in Wuhan (Figure 1(A)) on Feb 12th is still as  
31 high as 3,509. The person-to-person transmission will last for more than two months to early May  
32 2020. However, estimated with stage III data, the quarantine rate of Wuhan increases to 0.6185

1 and the un-quarantined infected individuals decreased to 334 on Feb 21th, 2020 (Figure 1(E)).

## 2 **Predictions**

3 After fitting the model with the recent data from stage II and stage III (for Wuhan), we make  
4 a series of predictions about future dynamics of the COVID-19 outbreak in China.

5 • The end times of the epidemic (with zero new confirmed infected as the criterion) of Wuhan  
6 and Hubei (excluding Wuhan) are around late-March, and around mid-March of China. The  
7 end times of the four first-tier cities, Beijing, Shanghai, Guangzhou and Shenzhen, are before  
8 March. The end time with zero un-quarantined infected as a criterion is usually earlier than  
9 that with zero new confirmed infected.

10 • The final infected number of the whole country is predicted to be 80,511 individuals, among  
11 which 49,510 are from Wuhan and 17,679 from Hubei (excluding Wuhan), and the rest 13,322  
12 are from other regions of China.

13 • Given the inferred end times, rigorous quarantine and control measures should be kept be-  
14 fore March in Beijing, Shanghai, Guangzhou and Shenzhen, and before late-March in China  
15 (including Hubei). We should further point out that, the real confirmed infected in Beijing  
16 (Figure S1(B)), Shanghai (Figure S2(B)) and Shenzhen (Figure S4(B)) are a bit larger than  
17 the predicted values by our model. This is likely caused by the recent return-to-work tide  
18 after the traditional Chinese Spring festival.

## 19 **Discussion**

20 We developed a model SUQC for the epidemic dynamics and control of COVID-19. SUQC uses  
21 four variables and as less parameters as possible to avoid over-fitting the data, while adequately  
22 characterizes the epidemic dynamics. The model is different from the well-known epidemic SEIR  
23 model in the following aspects: (1) the infected individuals are classified into un-quarantined, quar-  
24 antined and confirmed. And only the un-quarantined can infect the susceptible individuals; While  
25 in SEIR, all the infected are infectious; (2) the quarantine rate is a parameter in SUQC to explic-  
26 itly model the effects of quarantine and control measures; (3) SUQC distinguishes the confirmed  
27 infected (observed data) and the total infected individuals, and the parameter confirmation rate is  
28 affected by medical resources and the sensitivity of diagnosis methods. Overall, SUQC is developed

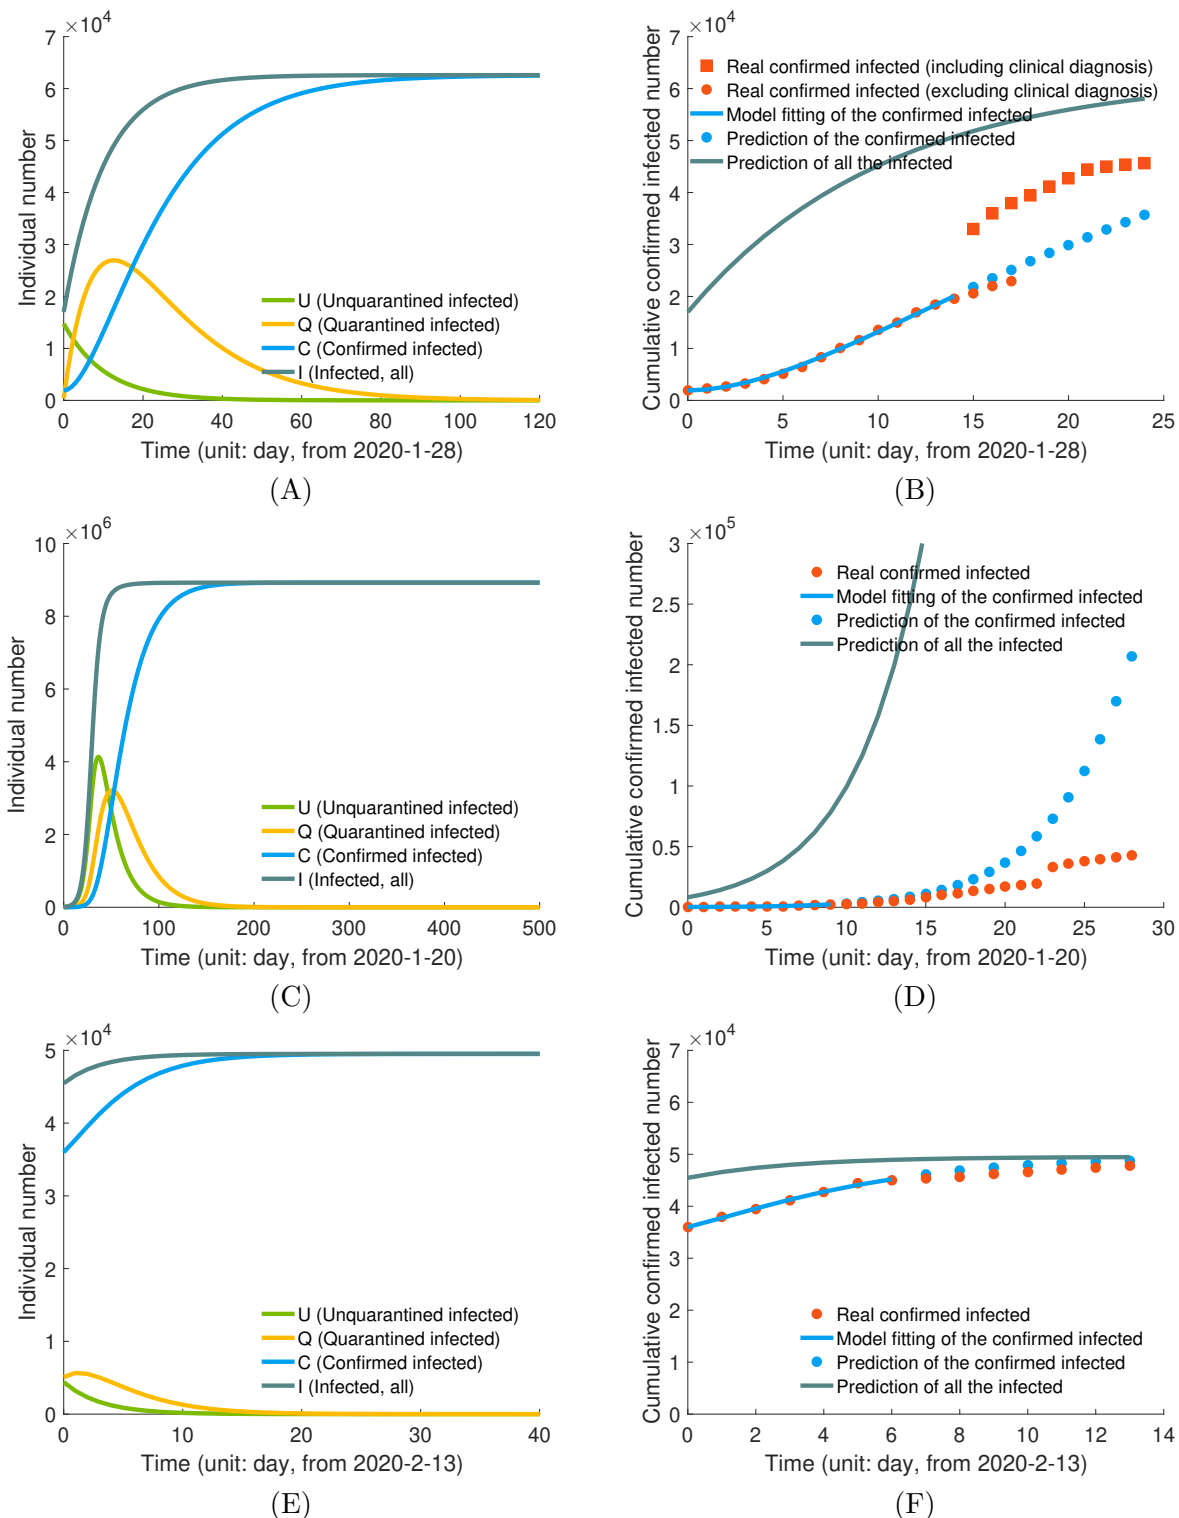

Figure 1: Inferring the epidemic dynamics in Wuhan: (A) prediction using stage II data; (B) Model-fitting and testing with stage II data. The first 15 data points (from Jan 28th) are used to infer the parameters, and the remaining points are used to test the model performance. (C) prediction using stage I data; (D) Model-fitting and testing with stage I data, the first 10 data points (from Jan 20th) are used to infer the parameters, and the remaining points are used to test the model; (E) prediction using stage III data; (D) Model-fitting and testing with stage III data. The first 7 data points (from Jan 23th) are used to infer the parameters, and the remaining points are used to test the model.

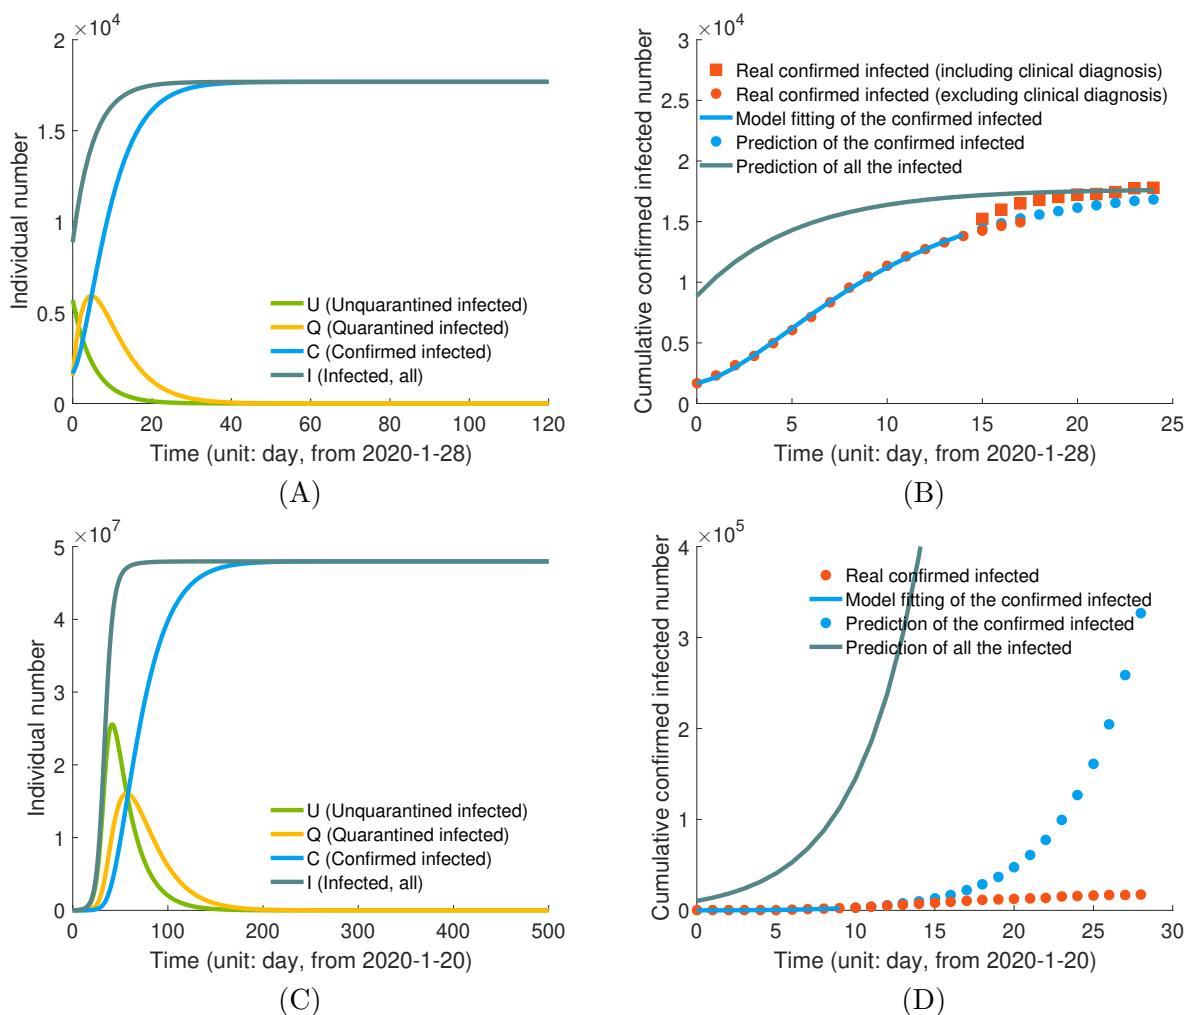

Figure 2: Inferring the epidemic dynamics in Hubei province (excluding Wuhan): (A) prediction using stage II data; (B) model-fitting and testing with stage II data. The first 15 data points (from Jan 28th) are used to infer the parameters, and the remaining points are used to test the model performance; (C) prediction using stage I data; (D) model-fitting and testing with stage I data. The first 10 data points (from Jan 20th) are used to infer the parameters, and the remaining points are used to test the model.

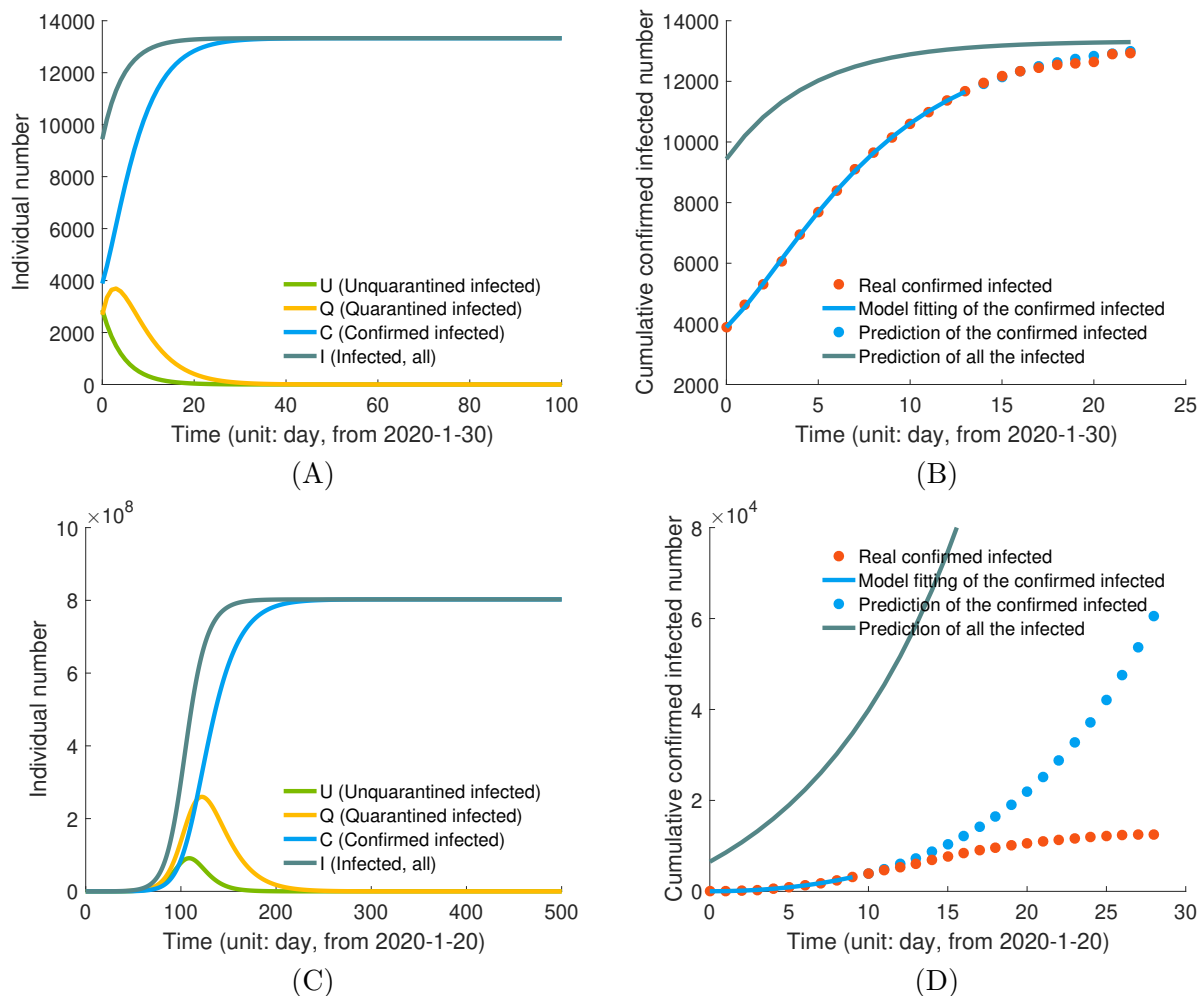

Figure 3: Inferring epidemic dynamics in China (excluding Hubei province): (A) prediction using stage II data; (B) model-fitting and testing with stage II data. The first 15 data points (from Jan 30th) are used to optimise the parameters, and the remaining points are used to test the model; (C) prediction using stage I data; (D) Model-fitting and testing with stage I data. The first 10 data points (from Jan 20th) are used to optimise the parameters, and the remaining points are used to test the model.

1 to characterize the dynamics of COVID-19, and is more suitable for analysis and prediction than  
2 adopting existing epidemic models.

3 SUQC is applied to the daily released data of China to analyze the dynamics of COVID-19  
4 outbreak, and demonstrates an accurate prediction of the trends with the test data. COVID-19  
5 has currently spread to more than 30 countries. Some countries, such as, South Korea, Japan and  
6 Iran are in their early stage of an outbreak while being under a high risk, and the governments are  
7 attempting to minimise further spread. SUQC can serve as a useful tool for quantifying parameters  
8 and variables concerning the effects of quarantine or confirmation methods on the epidemic, and  
9 further provide guidance on the control of the outbreak in these countries.

## 10 **Acknowledgements**

11 We thank Yongbiao Xue and Liping Wang for motivating this project. This project was sup-  
12 ported by the National Natural Science Foundation of China (Grant No. 31571370, 91631106, and  
13 91731302), the “Strategic Priority Research Program” of the Chinese Academy of Sciences (Grant  
14 No. XDB13000000), the National Key R&D Program of China (Grant No. 2018YFC1406902), and  
15 the One Hundred Talents Program of the Chinese Academy of Sciences.

## 16 **References**

- 17 [1] Wuhan Municipal Health Commission. Wuhan Municipal Health Commission brief-  
18 ing on the pneumonia epidemic situation 31 Dec 2019 [in Chinese]. Available at:  
19 <http://wjw.wuhan.gov.cn/front/web/showDetail/2019123108989> (Accessed: 23 February  
20 2020)
- 21 [2] Wang C, Horby PW, Hayden FG, Gao GF (2020) A novel coronavirus outbreak of global  
22 health concern. *Lancet*.[https://doi.org/10.1016/S0140-6736\(20\)30185-9](https://doi.org/10.1016/S0140-6736(20)30185-9)
- 23 [3] Chan JF-W, Yuan S, Kok K-H et al (2020) A familial cluster of pneumonia as-  
24 sociated with the 2019 novel coronavirus indicating person-to-person transmission:  
25 *Lancet*.[https://doi.org/10.1016/S0140-6736\(20\)30154-9](https://doi.org/10.1016/S0140-6736(20)30154-9)
- 26 [4] A study of a family cluster. Wang C, Horby PW, Hayden FG, Gao GF (2020) A  
27 novel coronavirus outbreak of global health concern. *Lancet*.[https://doi.org/10.1016/S0140-](https://doi.org/10.1016/S0140-6736(20)30185-9)  
28 [6736\(20\)30185-9](https://doi.org/10.1016/S0140-6736(20)30185-9)

- 1 [5] National Health Commission of the People's Republic of China. In-  
2fectious Disease Specialists. Prevention and control of novel coron-  
3avirus pneumonia (The Fifth Edition), [in Chinese]. Available at:  
4<http://www.nhc.gov.cn/jkj/s3577/202002/a5d6f7b8c48c451c87dba14889b30147.shtml> (Ac-  
5cessed: 23 February 2020)
- 6 [6] Du Z, Wang L, Chauchemez S, Xu X, Wang X, Cowling BJ, et al (2020) Risk for transportation  
7of 2019 novel coronavirus disease from Wuhan to other cities in China. *Emerg Infect Dis.*  
8<https://doi.org/10.3201/eid2605.200146> (Accessed: 23 February 2020)
- 9 [7] Li Q, Guan X, Wu P, Wang X, Zhou L, Tong Y, et al (2020) Early transmission dynamics  
10in Wuhan, China, of novel coronavirus-infected pneumonia. *N Engl J Med.* NEJMoa2001316;  
11Epub ahead of print.
- 12 [8] Juliette Stehlé, Nicolas Voirin, Alain Barrat, et al. Simulation of an SEIR infectious disease  
13model on the dynamic contact network of conference attendees[J]. 9(1):87.
- 14 [9] Fisman D , Khoo E , Tuite A . Early Epidemic Dynamics of the West African 2014 Ebola  
15Outbreak: Estimates Derived with a Simple Two-Parameter Model[J]. *PLoS Currents*, 2014,  
166.
- 17 [10] Imai N, Cori A, Dorigatti I, et al (2020) Report 3: Transmissibility of 2019-n-CoV.  
18Available at: [https://www.imperial.ac.uk/media/imperial-college/medicine/sph/ide/gida-  
19fellowships/Imperial-2019-nCoV-transmissibility.pdf](https://www.imperial.ac.uk/media/imperial-college/medicine/sph/ide/gida-fellowships/Imperial-2019-nCoV-transmissibility.pdf) (Accessed: 23 February 2020).
- 20 [11] Liu T, Hu J, Kang M. et al (2020) 'Transmission dynamics of 2019 novel coronavirus (2019-  
21nCoV)', bioRxiv. doi: 10.1101/2020.01.25.919787.
- 22 [12] Majumder, M. and Mandl, K. D (2020) 'Early Transmissibility Assessment of a Novel Coron-  
23avirus in Wuhan, China'. Available at: <https://papers.ssrn.com/abstract=3524675> (Accessed:  
2423 February 2020).
